# Supplementary material for: Characteristics of Components and Density of Rigid Nanoclay-Filled Medium-Density Polyurethane Foams Produced in a Sealed Mould
Source: MDPI journal article supplement (doi:10.3390/polym15153228), 2023-07-28
Supplement: s1 [file s1]

# Characteristics of Components and Density of Rigid Nanoclay-Filled Medium-Density Polyurethane Foams Produced in a Sealed Mold

Ilze Beverte, Ugis Cabulis, Janis Andersons, Mikelis Kirpluks, Vilis Skruls and Peteris Cabulis

## Supplementary Materials

**Table S1.** Specimens in the Section S: a) The 9 central specimens are located at the intersection of layers 2, 3, 4 and columns 2, 3, 4 (Enclosed by the ellipse) and b) The 16 perimetral specimens are located in columns 1, 5 and layers 1, 5.

| Layers | Columns |     |     |     |     |
|--------|---------|-----|-----|-----|-----|
|        | 5       | 4   | 3   | 2   | 1   |
| 5      | 5-5     | 5-4 | 5-3 | 5-2 | 5-1 |
| 4      | 4-5     | 4-4 | 4-3 | 4-2 | 4-1 |
| 3      | 3-5     | 3-4 | 3-3 | 3-2 | 3-1 |
| 2      | 2-5     | 2-4 | 2-3 | 2-2 | 2-1 |
| 1      | 1-5     | 1-4 | 1-3 | 1-2 | 1-1 |

**Table S2.** Density of cubic specimens from Sections C-a and C-b (In order of an increase of blocks' mass). "AVERAGE" – average value, " $\sigma$ " - standard deviation and " $v$ " – coefficient of variation.

| Mass of a block $m_n$ ; g | Concentr. of filler; % | Number of a block | Section C-a          |                            | Section C-b          |                            | Difference of density $\Delta\rho_{ij}$ ; kg/m <sup>3</sup> | Relative difference of density $R_{ij}$ ; % | Average density $\rho_{av}$ ; kg/m <sup>3</sup> |
|---------------------------|------------------------|-------------------|----------------------|----------------------------|----------------------|----------------------------|-------------------------------------------------------------|---------------------------------------------|-------------------------------------------------|
|                           |                        |                   | Number of a specimen | $\rho$ ; kg/m <sup>3</sup> | Number of a specimen | $\rho$ ; kg/m <sup>3</sup> |                                                             |                                             |                                                 |
| 244                       | 3.00                   | 6                 | 1                    | 218.5                      | 1'                   | 218.0                      | 0.5                                                         | 0                                           | 218.3                                           |
|                           |                        |                   | 2                    | 216.4                      | 2'                   | 216.1                      | 0.3                                                         | 0                                           | 216.3                                           |
|                           |                        |                   | 3                    | 217.8                      | 3'                   | 216.5                      | 1.3                                                         | 1                                           | 217.2                                           |
|                           |                        |                   | 4                    | 217.7                      | 4'                   | 216.2                      | 1.5                                                         | 1                                           | 216.9                                           |
|                           |                        |                   | 5                    | 218.8                      | 5'                   | 216.9                      | 1.9                                                         | 1                                           | 217.8                                           |
| 245                       | 0.50                   | 3                 | 1                    | 221.5                      | 1'                   | 221.9                      | - 0.4                                                       | 0                                           | 221.7                                           |
|                           |                        |                   | 2                    | 221.0                      | 2'                   | 219.1                      | 1.8                                                         | 1                                           | 220.1                                           |
|                           |                        |                   | 3                    | 220.6                      | 3'                   | 218.5                      | 2.1                                                         | 1                                           | 219.6                                           |
|                           |                        |                   | 4                    | 220.6                      | 4'                   | 218.8                      | 1.7                                                         | 1                                           | 219.7                                           |
|                           |                        |                   | 5                    | 222.2                      | 5'                   | 220.1                      | 2.1                                                         | 1                                           | 221.1                                           |
| 249                       | 1.00                   | 4                 | 1                    | 221.2                      | 1'                   | 220.2                      | 1.0                                                         | 0                                           | 220.7                                           |
|                           |                        |                   | 2                    | 219.4                      | 2'                   | 218.6                      | 0.8                                                         | 0                                           | 219.0                                           |
|                           |                        |                   | 3                    | 220.9                      | 3'                   | 217.2                      | 3.7                                                         | 2                                           | 219.0                                           |
|                           |                        |                   | 4                    | 220.9                      | 4'                   | 217.3                      | 3.6                                                         | 2                                           | 219.1                                           |
|                           |                        |                   | 5                    | 221.3                      | 5'                   | 218.6                      | 2.7                                                         | 1                                           | 220.0                                           |
| 250                       | 0.00                   | 1                 | 1                    | 220.9                      | 1'                   | 220.3                      | 0.6                                                         | 0                                           | 220.6                                           |
|                           |                        |                   | 2                    | 219.3                      | 2'                   | 216.3                      | 2.9                                                         | 1                                           | 217.8                                           |
|                           |                        |                   | 3                    | 218.3                      | 3'                   | 216.9                      | 1.3                                                         | 1                                           | 217.6                                           |

|                    |      |   |           |       |           |       |       |   |       |
|--------------------|------|---|-----------|-------|-----------|-------|-------|---|-------|
| 253                | 0.25 | 2 | 4         | 218.0 | 4'        | 215.5 | 2.5   | 1 | 216.7 |
|                    |      |   | 5         | 221.3 | 5'        | 219.2 | 2.1   | 1 | 220.3 |
|                    |      |   | 1         | 223.3 | 1'        | 221.7 | 1.6   | 1 | 222.5 |
|                    |      |   | 2         | 220.0 | 2'        | 219.0 | 0.9   | 0 | 219.5 |
|                    |      |   | 3         | 220.1 | 3'        | 217.9 | 2.2   | 1 | 219.0 |
|                    |      |   | 4         | 219.7 | 4'        | 218.2 | 1.5   | 1 | 218.9 |
|                    |      |   | 5         | 222.0 | 5'        | 219.9 | 2.1   | 1 | 221.0 |
| 258                | 5.00 | 7 | 1         | 226.5 | 1'        | 226.3 | 0.3   | 0 | 226.4 |
|                    |      |   | 2         | 224.9 | 2'        | 224.4 | 0.5   | 0 | 224.7 |
|                    |      |   | 3         | 223.5 | 3'        | 222.7 | 0.8   | 0 | 223.1 |
|                    |      |   | 4         | 225.3 | 4'        | 224.2 | 1.1   | 1 | 224.8 |
|                    |      |   | 5         | 226.7 | 5'        | 225.5 | 1.1   | 1 | 226.1 |
| 261                | 2.00 | 5 | 1         | 230.8 | 1'        | 231.4 | - 0.5 | 0 | 231.1 |
|                    |      |   | 2         | 230.0 | 2'        | 228.7 | 1.3   | 1 | 229.3 |
|                    |      |   | 3         | 229.5 | 3'        | 227.8 | 1.7   | 1 | 228.6 |
|                    |      |   | 4         | 229.3 | 4'        | 228.0 | 1.3   | 1 | 228.6 |
|                    |      |   | 5         | 232.6 | 5'        | 229.7 | 3.0   | 1 | 231.1 |
|                    |      |   | AVERAGE = | 222.3 | AVERAGE = | 220.8 |       |   |       |
|                    |      |   | σ =       | ± 4.1 | σ =       | ± 4.4 |       |   |       |
|                    |      |   | v =       | 1.9 % | v =       | 2.0 % |       |   |       |
| Sections C-a + C-b |      |   | AVERAGE = | 221.5 |           |       |       |   |       |
|                    |      |   | σ =       | ± 4.3 |           |       |       |   |       |
|                    |      |   | v =       | 1.9 % |           |       |       |   |       |

Difference of densities of the cubic specimens from similar locations (1 and 1', 2 and 2', 3 and 3', 4 and 4' and 5 and 5) in the Sections C-a and C-b:

$$\Delta\rho_{ij} = \rho_i - \rho_j, \quad (1)$$

where  $\rho_i$  and  $\rho_j$  – density of the i-th and j-th cubic specimens from similar locations in the Sections C-a and C-b; i = 1, 2, 3, 4 and 5 and j = 1', 2', 3', 4' and 5'.

The relative density difference of the i-th and j-th cubic specimens from similar locations in the Sections C-a and C-b; i = 1, 2, 3, 4 and 5 and j = 1', 2', 3', 4' and 5':

$$R_{ij} = \Delta\rho_{ij}/\rho_i = (\rho_i - \rho_j)/\rho_i. \quad (2)$$

**Table S3.** Denotations of density of PU foams' specimens from the Section S.

| Number of range of density | Range of density; kg/m <sup>3</sup>        | Shade |
|----------------------------|--------------------------------------------|-------|
| 1                          | $210 \leq \rho \leq 220$ kg/m <sup>3</sup> |       |
| 2                          | $220 < \rho \leq 230$ kg/m <sup>3</sup>    |       |
| 3                          | $230 < \rho \leq 240$ kg/m <sup>3</sup>    |       |
| 4                          | $240 < \rho \leq 250$ kg/m <sup>3</sup>    |       |
| 3                          | $250 < \rho \leq 260$ kg/m <sup>3</sup>    |       |
| 6                          | $260 < \rho \leq 270$ kg/m <sup>3</sup>    |       |
| 7                          | $270 < \rho \leq 280$ kg/m <sup>3</sup>    |       |

**Tables S4 - S10.** Density distribution in the Section S of the blocks (In order of an increase of blocks' mass).

**Table S4.** Mass of the block  $m = 244$  g; block № 6.

|   | 5   | 4   | 3   | 2   | 1   |
|---|-----|-----|-----|-----|-----|
| 5 | 239 | 240 | 232 | 240 | 239 |
| 4 | 234 | 236 | 224 | 236 | 234 |
| 3 | 236 | 229 | 224 | 229 | 236 |
| 2 | 235 | 228 | 229 | 228 | 235 |
| 1 | 249 | 241 | 236 | 241 | 249 |

**Table S5.** Mass of the block  $m = 245$  g; block № 3.

|   | 5   | 4   | 3   | 2   | 1   |
|---|-----|-----|-----|-----|-----|
| 5 | 248 | 241 | 241 | 241 | 248 |
| 4 | 241 | 230 | 233 | 230 | 241 |
| 3 | 242 | 227 | 228 | 227 | 242 |
| 2 | 244 | 235 | 232 | 235 | 244 |
| 1 | 258 | 251 | 252 | 251 | 258 |

**Table S6.** Mass of the block  $m = 249$  g; block № 4.

|   | 5   | 4   | 3   | 2   | 1   |
|---|-----|-----|-----|-----|-----|
| 5 | 243 | 238 | 234 | 238 | 243 |
| 4 | 238 | 234 | 242 | 234 | 238 |
| 3 | 241 | 234 | 235 | 234 | 241 |
| 2 | 240 | 233 | 231 | 233 | 240 |
| 1 | 258 | 246 | 245 | 246 | 258 |

**Table S7.** Mass of the block  $m = 250$  g; block № 1.

|   | 5   | 4   | 3   | 2   | 1   |
|---|-----|-----|-----|-----|-----|
| 5 | 256 | 254 | 255 | 254 | 256 |
| 4 | 242 | 237 | 235 | 237 | 242 |
| 3 | 240 | 231 | 230 | 231 | 240 |
| 2 | 244 | 234 | 231 | 234 | 244 |
| 1 | 258 | 258 | 257 | 258 | 258 |

**Table S8.** Mass of the block  $m = 253$  g; block № 2.

|   | 5   | 4   | 3   | 2   | 1   |
|---|-----|-----|-----|-----|-----|
| 5 | 255 | 257 | 256 | 257 | 255 |
| 4 | 242 | 238 | 237 | 238 | 242 |
| 3 | 241 | 232 | 231 | 232 | 241 |
| 2 | 243 | 235 | 231 | 235 | 243 |
| 1 | 259 | 257 | 255 | 257 | 259 |

**Table S9.** Mass of the block  $m = 258$  g; block № 7.

|   | 5   | 4   | 3   | 2   | 1   |
|---|-----|-----|-----|-----|-----|
| 5 | 242 | 239 | 233 | 239 | 242 |
| 4 | 243 | 232 | 232 | 232 | 243 |
| 3 | 241 | 243 | 234 | 243 | 241 |
| 2 | 245 | 235 | 232 | 235 | 245 |
| 1 | 264 | 254 | 256 | 254 | 264 |

**Table S10.** Mass of the block  $m = 261$  g; block № 5.

|   | 5   | 4   | 3   | 2   | 1   |
|---|-----|-----|-----|-----|-----|
| 5 | 255 | 255 | 257 | 255 | 255 |
| 4 | 242 | 239 | 237 | 239 | 242 |
| 3 | 242 | 243 | 245 | 243 | 242 |
| 2 | 249 | 243 | 243 | 243 | 249 |
| 1 | 275 | 261 | 266 | 261 | 275 |

**Table S11.** Average density of the side specimens in Section “S” and cubic specimens in Section C-a (In order of an increase of the blocks’ mass). “ $\sigma$ ” – standard deviation and “ $v$ ” – coefficient of variation.

| Mass of a block m; g | Concentration of filler $\eta$ ; % | Average density $\pm \sigma$ ; kg/m <sup>3</sup> ( $v$ ; %) |                 |                 |
|----------------------|------------------------------------|-------------------------------------------------------------|-----------------|-----------------|
|                      |                                    | Section S                                                   |                 | Section C-a     |
|                      |                                    | $\rho_{16}$                                                 | $\rho_9$        | $\rho_{2-4}$    |
| 244                  | 3.00                               | 238 $\pm$ 5 (2)                                             | 229 $\pm$ 4 (2) | 217 $\pm$ 1 (0) |
| 245                  | 0.50                               | 247 $\pm$ 6 (2)                                             | 231 $\pm$ 3 (1) | 221 $\pm$ 0 (0) |
| 249                  | 1.00                               | 243 $\pm$ 7 (3)                                             | 234 $\pm$ 3 (1) | 220 $\pm$ 1 (0) |
| 250                  | 0.00                               | 251 $\pm$ 7 (3)                                             | 233 $\pm$ 3 (1) | 219 $\pm$ 1 (0) |
| 253                  | 0.25                               | 251 $\pm$ 8 (3)                                             | 234 $\pm$ 3 (1) | 220 $\pm$ 0 (0) |
| 258                  | 5.00                               | 247 $\pm$ 9 (4)                                             | 235 $\pm$ 5 (2) | 225 $\pm$ 1 (0) |
| 261                  | 2.00                               | 255 $\pm$ 11 (4)                                            | 242 $\pm$ 3 (1) | 230 $\pm$ 0 (0) |

**Table S12.** Density difference and relative density difference of the side specimens in Section “S” and cubic specimens in Section C-a (In order of an increase of the blocks’ mass).

| Mass of a block m; g | Concentration of filler $\eta$ ; % | Density difference; kg/m <sup>3</sup> |                      |                       | Relative density difference; % |             |              |
|----------------------|------------------------------------|---------------------------------------|----------------------|-----------------------|--------------------------------|-------------|--------------|
|                      |                                    | $\Delta\rho_{16,9}$                   | $\Delta\rho_{9,2-4}$ | $\Delta\rho_{16,2-4}$ | $R_{16,9}$                     | $R_{9,2-4}$ | $R_{16,2-4}$ |
| 244                  | 3.00                               | 9                                     | 12                   | 21                    | 4                              | 6           | 10           |
| 245                  | 0.50                               | 16                                    | 10                   | 26                    | 7                              | 5           | 12           |
| 249                  | 1.00                               | 9                                     | 14                   | 23                    | 4                              | 6           | 10           |
| 250                  | 0.00                               | 18                                    | 14                   | 32                    | 8                              | 6           | 15           |
| 253                  | 0.25                               | 17                                    | 14                   | 31                    | 7                              | 6           | 14           |
| 258                  | 5.00                               | 12                                    | 10                   | 22                    | 5                              | 4           | 10           |
| 261                  | 2.00                               | 13                                    | 12                   | 25                    | 5                              | 5           | 11           |

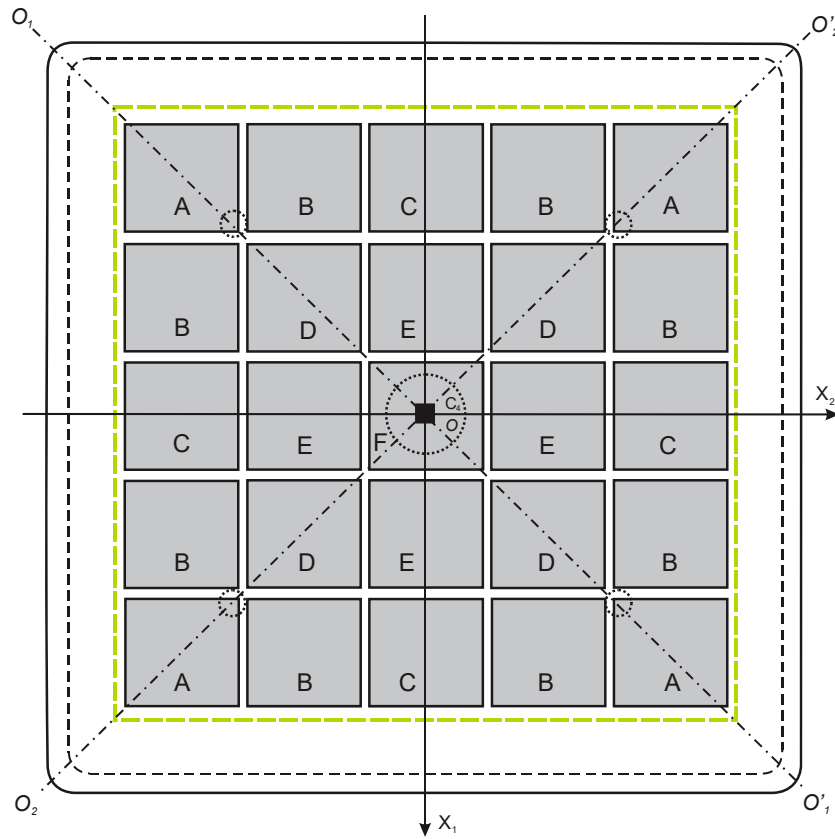

**Figure S1.** Locations A, B, C, D, E and F of specimens at similar foaming conditions in a PU foams' block: A - 1 and 5 (4 specimens); B - 2, 4 and 1', 5' (8 specimens); C - 3 (4 specimens); D - 2' (4 specimens), 4'; E - 3' (4 specimens) and F - the central specimen.
